# Supplementary material for: A porous current collector cleaner enables thin cathode electrolyte interphase on LiCoO2 for stable high-voltage cycling
Source: Royal Society of Chemistry journal article supplement (doi:10.1039/d1ta07268d), 2021-01-01
Supplement: d1ta07268d1.pdf [file d1ta07268d1.pdf]

# Electronic Supplementary Information

## **Porous current collector cleaner enables thin cathode electrolyte interphase on LiCoO<sub>2</sub> for stable high-voltage cycling**

Zhong Xu Lu<sup>a</sup>, Ke Wen Mu<sup>a</sup>, Zhi Yong Zhang<sup>a</sup>, Qin Luo<sup>a</sup>, Yan Hong Yin<sup>\*a</sup>, Xian Bin Liu<sup>a</sup>, Ye Sheng Li<sup>a</sup>,  
Yong Lei<sup>\*b</sup> and Zi Ping Wu<sup>\*a</sup>

<sup>a</sup> Ganzhou Key Laboratory of Advanced Metals and Functional Materials, School of Materials Science and Engineering, Jiangxi University of Science and Technology (JXUST), Ganzhou 341000, P. R. China.

<sup>b</sup> Fachgebiet Angewandte Nanophysik, Institut für Physik & ZMN MacroNano (ZIK), Technische Universität Ilmenau, Ilmenau 98693, Germany.

\* Corresponding author E-mail: [yinyanhong@jxust.edu.cn](mailto:yinyanhong@jxust.edu.cn) (Y. H. Yin); [yong.lei@tu-ilmenau.de](mailto:yong.lei@tu-ilmenau.de) (Y. Lei); [wuziping724@jxust.edu.cn](mailto:wuziping724@jxust.edu.cn) (Z. P. Wu)

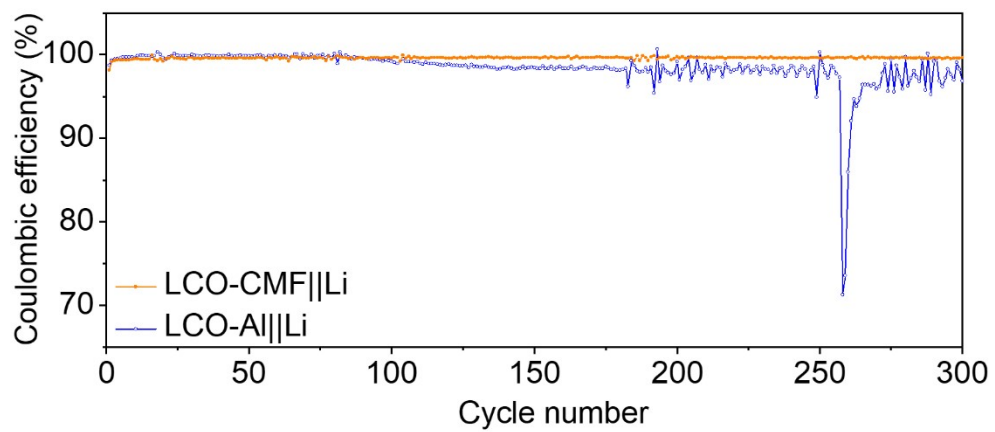

**Fig. S1** The Coulombic efficiency of LCO-Al||Li and LCO-CMF||Li at different cycles

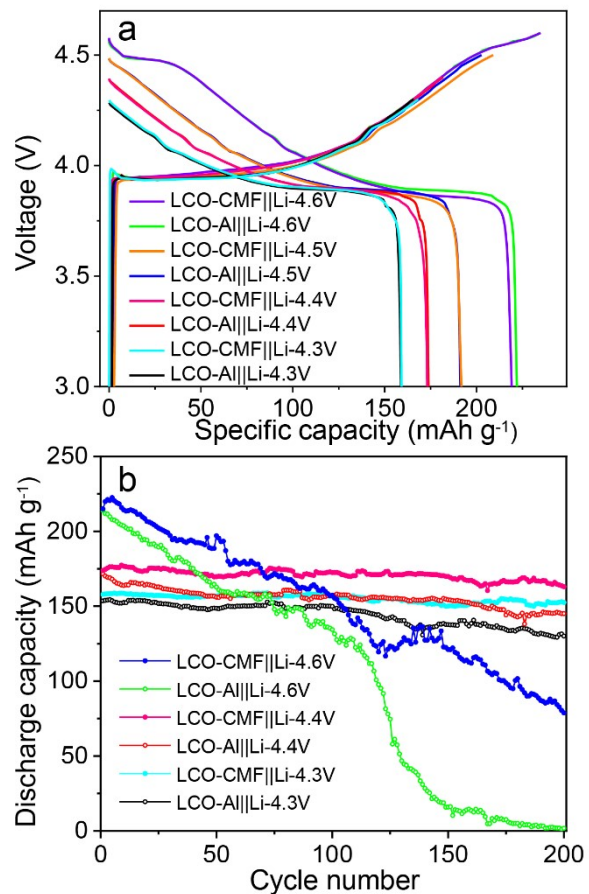

**Fig. S2** The first discharging/charging curves (a) at 0.1 C and cycles performance (b) of LCO-Al||Li and LCO-CMF||Li with different cutoff voltage at 0.5C

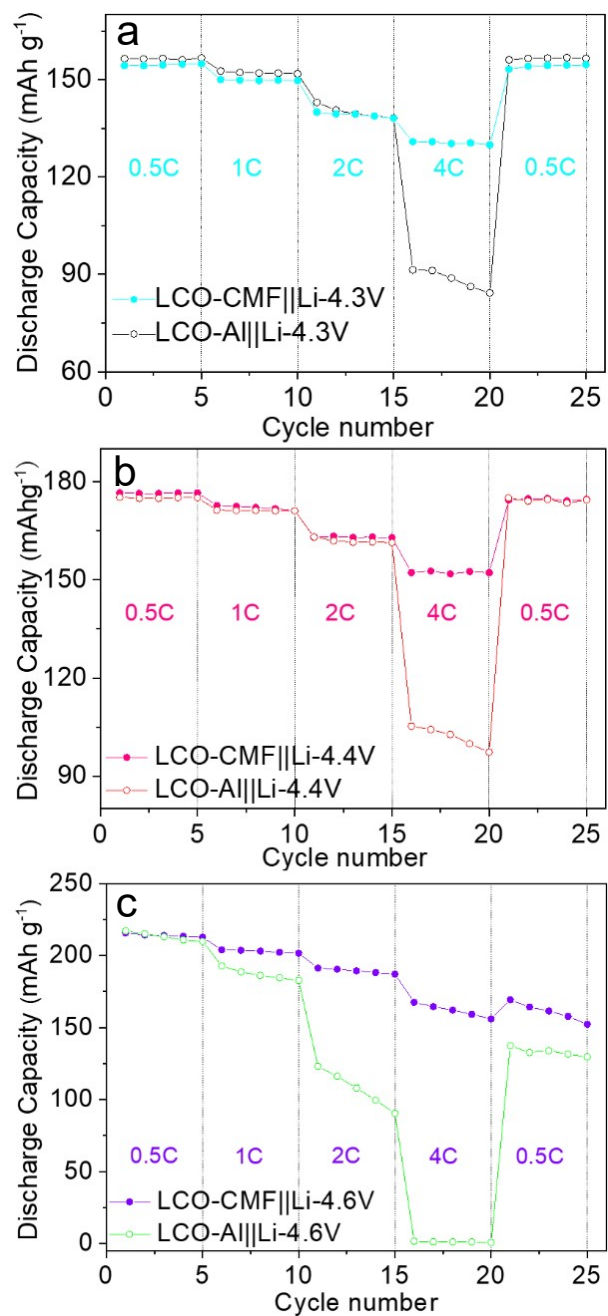

**Fig. S3** The rate capability of LCO-Al||Li and LCO-CMF||Li with mass loading of 5 mg cm<sup>-2</sup> at cutoff voltage of 4.3 V (a), 4.4 V (b) and 4.6 V (c)

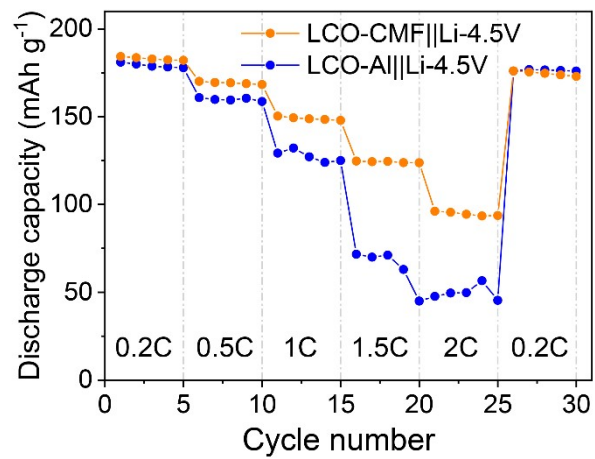

**Fig. S4** The rate capability of LCO-Al||Li and LCO-CMF||Li with a high mass loading of 16 mg cm<sup>-2</sup> at cutoff voltage of 4.5 V

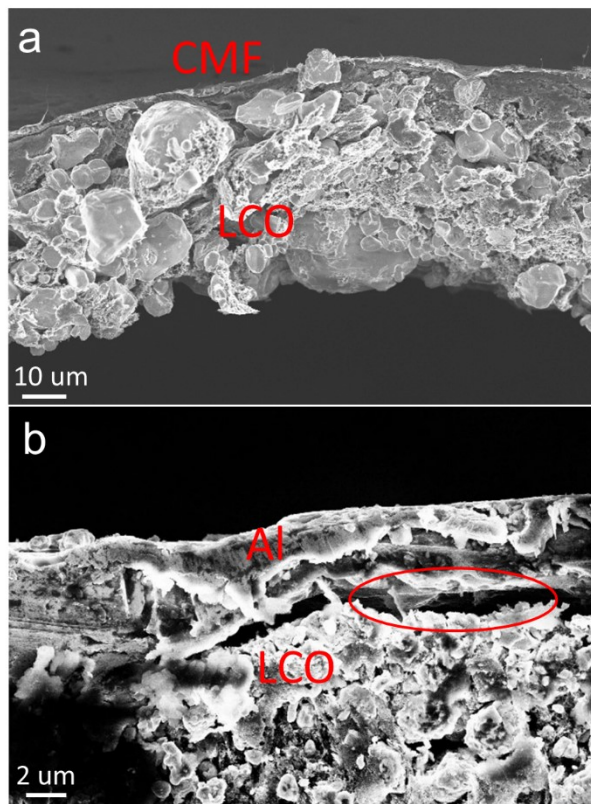

**Fig. S5** The typical cross-section images of LCO-CMF (a) and LCO-Al (b) electrodes

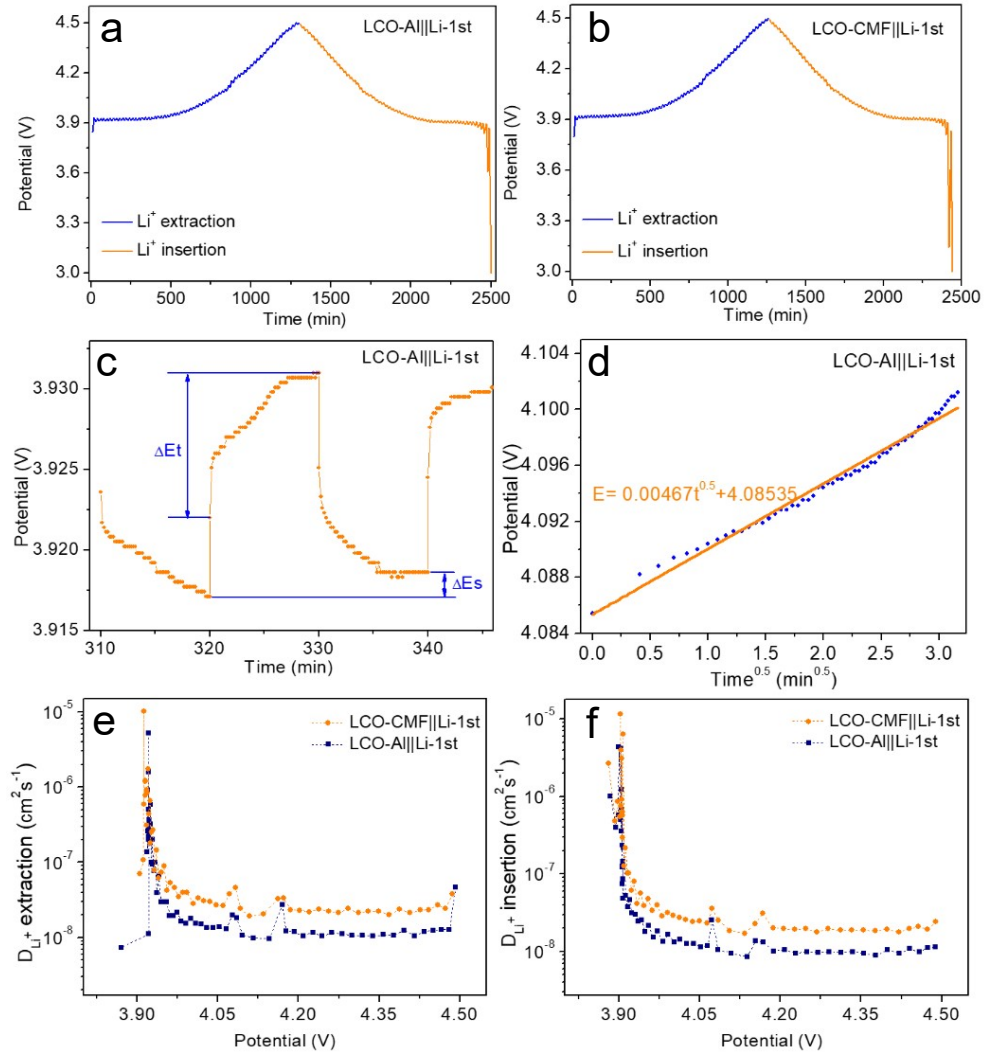

**Fig. S6** The first cycle galvanostatic intermittent titration technique (GITT) curves at 0.1 C of LCO-Al (a) and LCO-CMF (b), E vs t(c) in a single step, linear relationship (d) between E and  $t^{0.5}$  during a typical titration and extraction (e) and insertion (f) of  $D_{Li^+}$  values calculated from the GITT curves for the cells based different current collectors.

To study the  $Li^+$  diffusivity of LCO using different Al foil and CMF, the GITT experiment was performed on electrode LCO-Al during the first  $Li^+$  insertion/extraction processes at room temperature. The  $Li^+$  diffusion coefficient ( $D_{Li}$ ) can be determined using the Fick's second law with equation (1):<sup>1, 2</sup>

$$D_{Li} = \frac{4}{\pi} \left( \frac{m_B V_m}{M_B S} \right)^2 \left[ \frac{\Delta E_s}{t \left( \frac{dE}{d\sqrt{t}} \right)} \right]^2 \ll \frac{L^2}{D_{Li}} \quad (1)$$

where  $M_B$  is the molar weight of LCO,  $S$  is the real surface area of LCO,  $V_m$  is molar volume of LCO,  $m_B$  is mass weight of LCO,  $t$  is titration time,  $\Delta E_s$  is potential variation during pulse, and  $\Delta E_s$  is variation in equilibrium potential. Since potential was linearly proportional to  $t^{0.5}$  during single titration (Fig. S18c), equation (1) was simplified as equation (2):

$$D_{Li} = \frac{4}{\pi t} \left( \frac{m_B V_m}{M_B S} \right)^2 \left( \frac{\Delta E S}{\Delta E t} \right)^2 \left( t \ll \frac{L^2}{D_{Li}} \right) \quad (2)$$

Based on the calculation, the LCO-Al||Li and LCO-CMF||Li cell variation tendencies of  $D_{Li}$  during the  $Li^+$  extraction/insertion processes are shown in Fig. S5e, f.



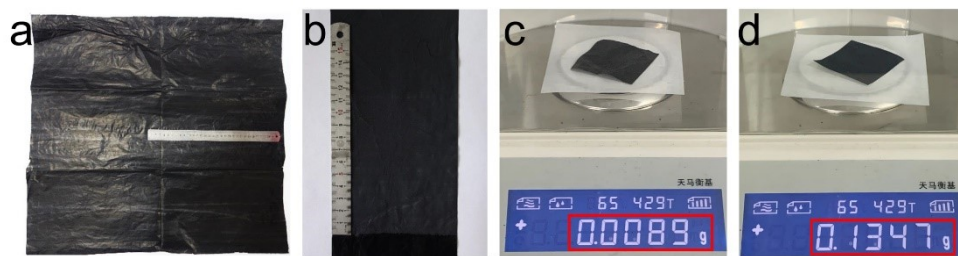

**Fig. S7** The photograph of CMF (a), LCO-CMF (b), and the weight of the CMF (c) and LCO-CMF (d) with area of  $\sim 5 \times 5 \text{ cm}^2$

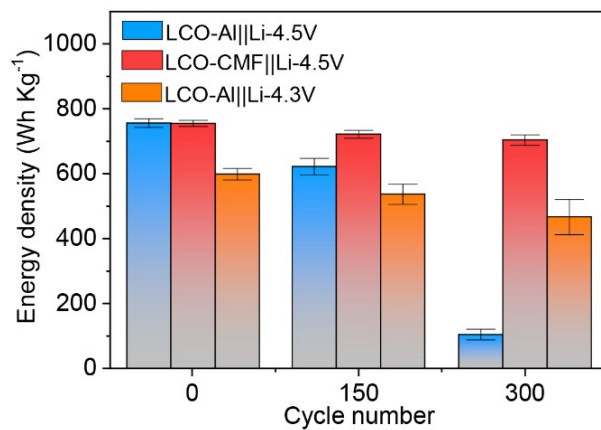

**Fig. S8** The energy density of LCO-Al||Li with cutoff voltage of 4.3 V, LCO-Al||Li with cutoff voltage of 4.5 V and LCO-CMF||Li with cutoff voltage of 4.5 V, the energy densities were calculated based on weight of the LCO

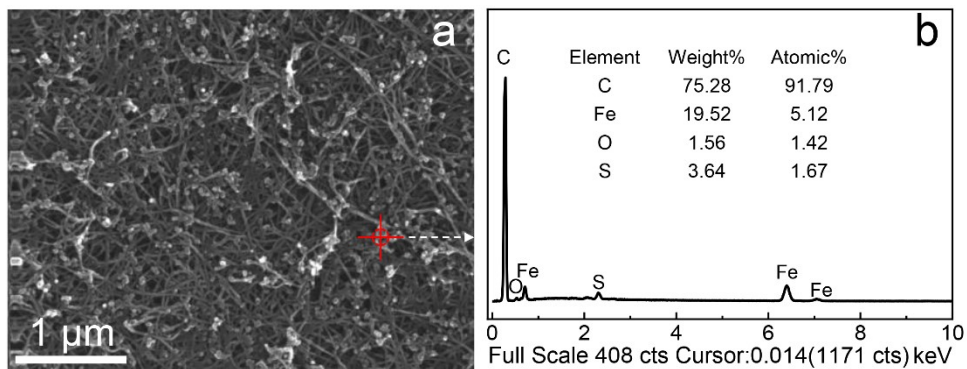

**Fig. S9** The typical SEM image of the as-prepared CMF (a) and the EDS result (b) of the selected area in (a)

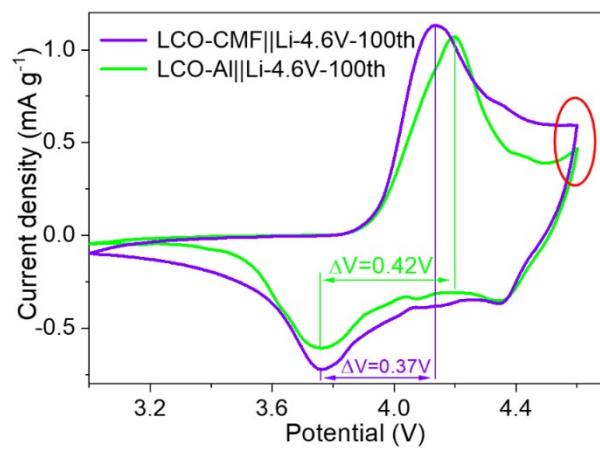

**Fig. S10** The CV curves of LCO-Al||Li and LCO-CMF||Li with cutoff voltage of 4.6 V after 100 cycles

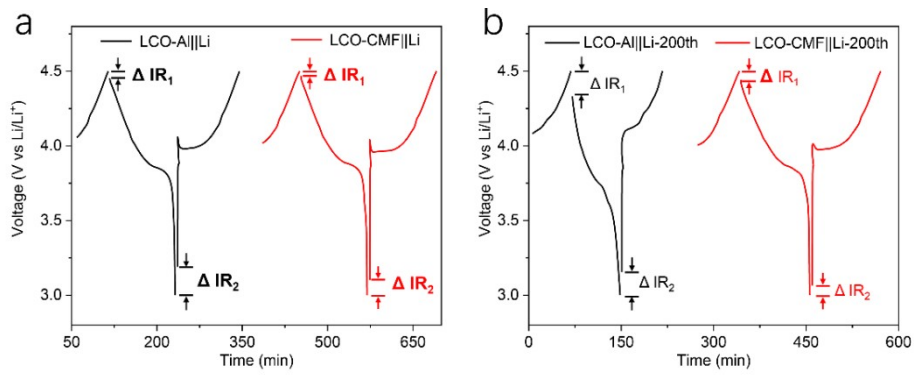

**Fig. S11** Galvanostatic charge/discharge of the LTO-AI||Li and LTO-CMF||Li at first (a) and 200 cycles (b)

with a C-rate of 0.5 C

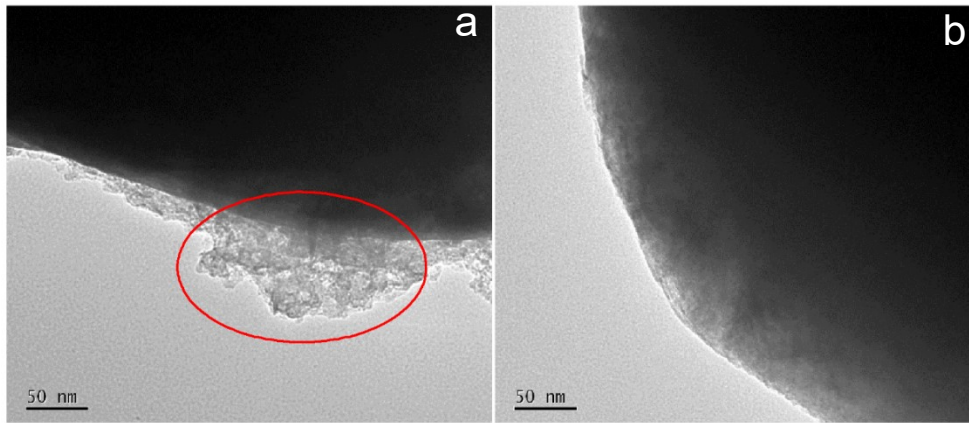

**Fig. S12** The HRTEM images of surface of LCO on Al foil (a) and CMF (b) after 200 cycles

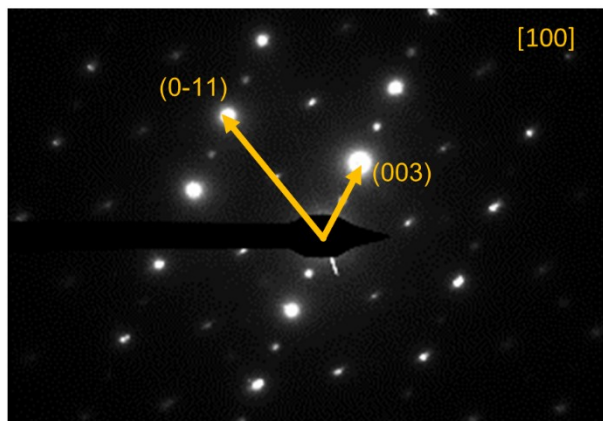

**Fig. S13** The SAED of LCO peeled off from LCO-CMF electrode after 200 cycles

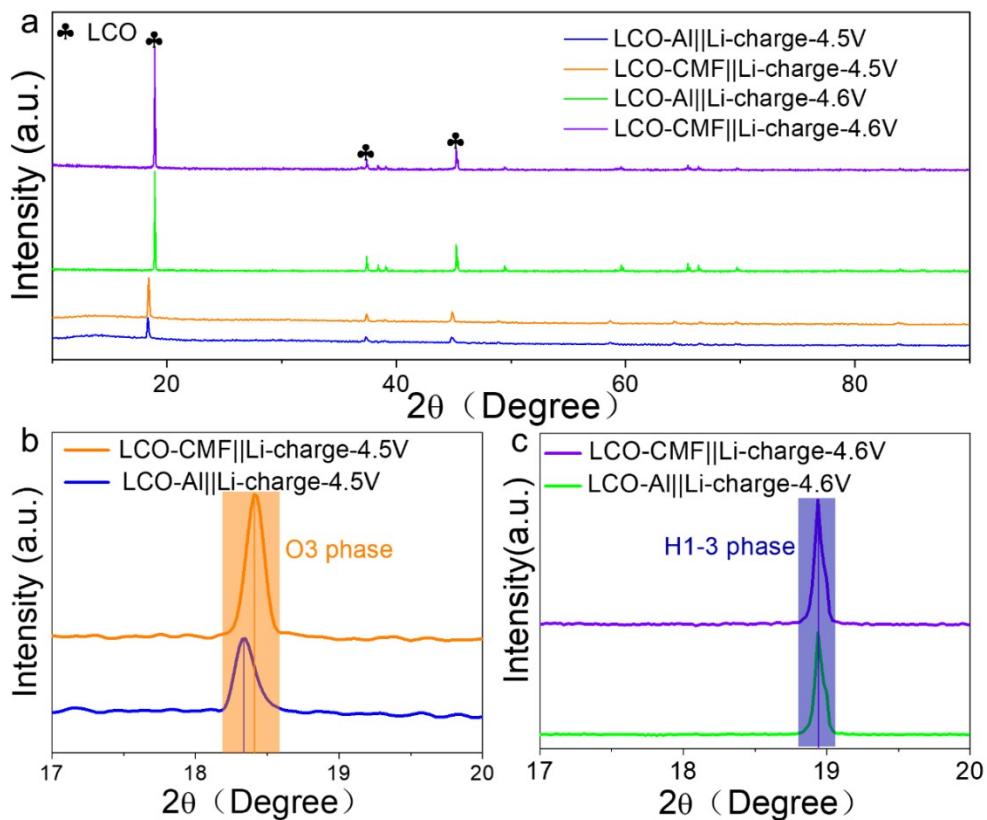

**Fig. S14** The XRD patterns of LCO peeled off from LCO-Al and LCO-CMF with cutoff voltage of 4.5 V and 4.6 V after 200 cycles (a), the enlarged XRD patterns of different electrode after cycles with cutoff voltage of 4.5 V (b) and 4.6 V (c)



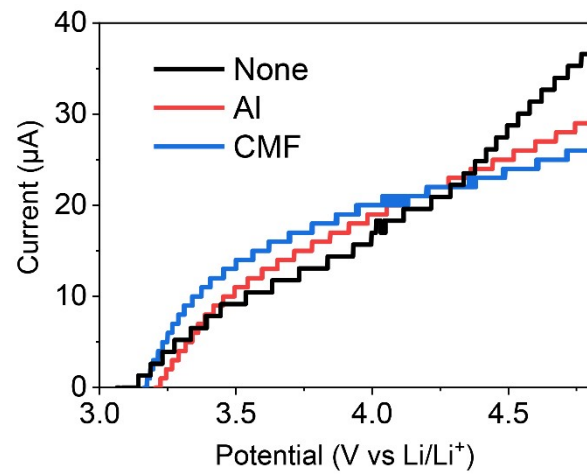

**Fig. S15** The linear sweep voltammetry of electrolyte (LiPF<sub>6</sub> in EC/DEC) in a coin cell with current collector tested voltage from 3.0 V to 5.0 V, the scanning rate is 0.1 mV s<sup>-1</sup>

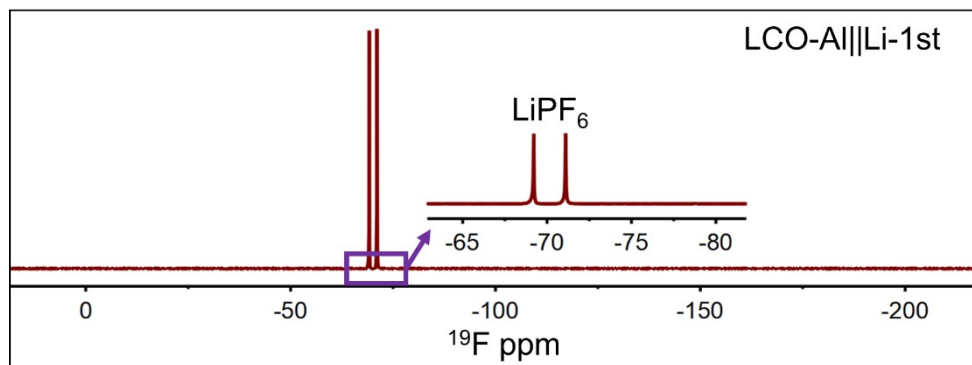

**Fig. S16** Typical  $^{19}\text{F}$  NMR spectrum of electrolyte from LCO-Al||Li after first cycles

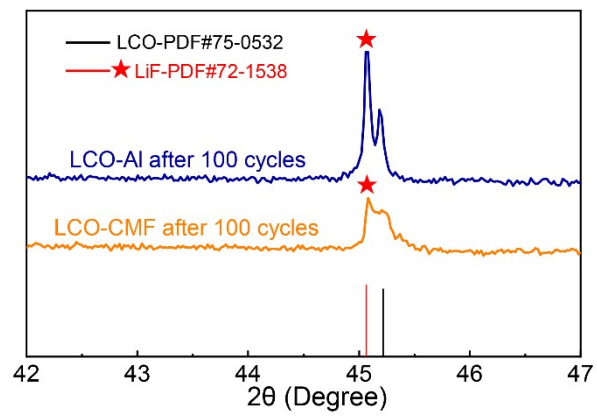

**Fig. S17** The magnified XRD patterns of LCO for different electrodes after cycles near the strongest peaks

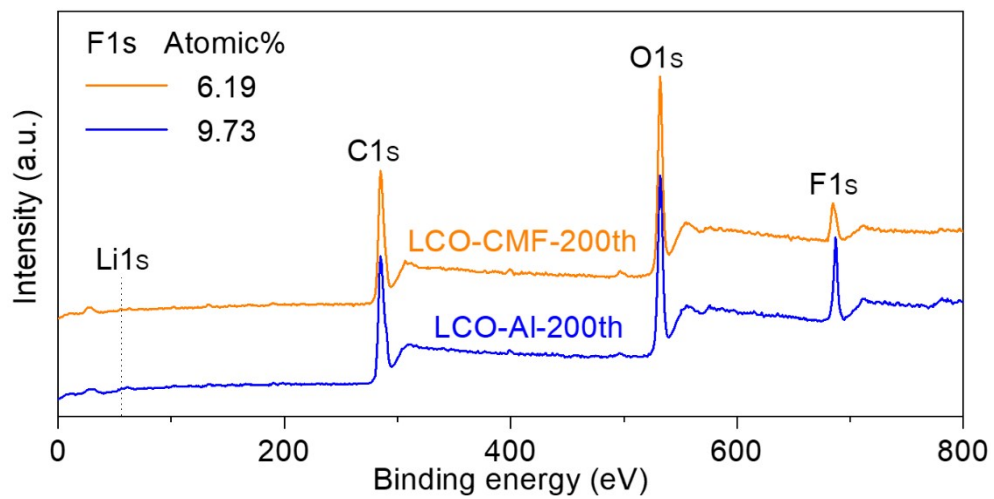

**Fig. S18** The XPS patterns of LCO from the surface of LCO-Al and LCO-CMF after 200 cycles

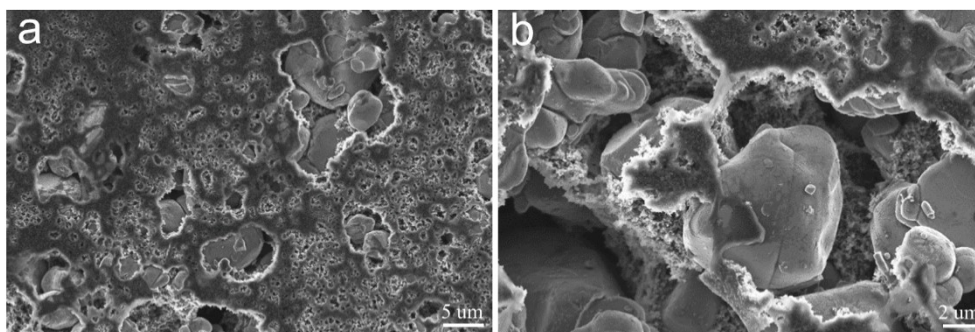

**Fig. S19** The typical SEM images of the LCO surface (a, b) near the current collector side from the LCO-Al electrode

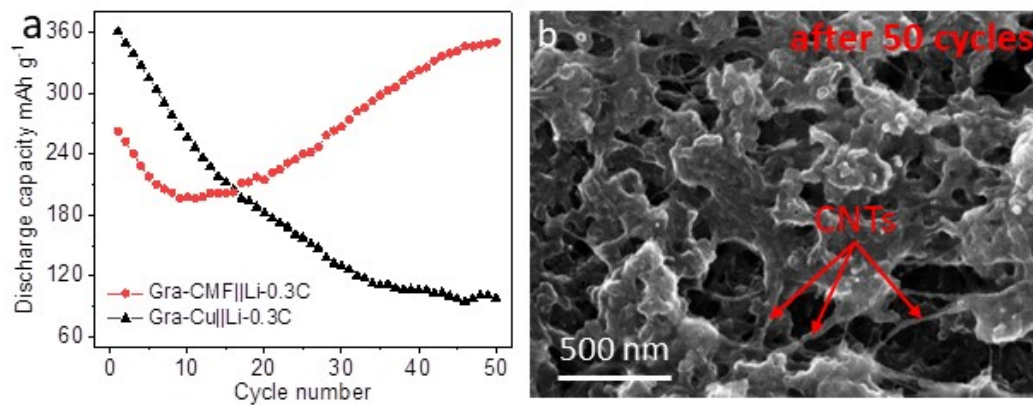

**Fig. S20** The cycle performances (a) of Graphite-Cu||Li and Graphite-CMF||Li at 0.5C and the typical SEM

image (b) of CMF from Graphite-CMF after 50 cycles

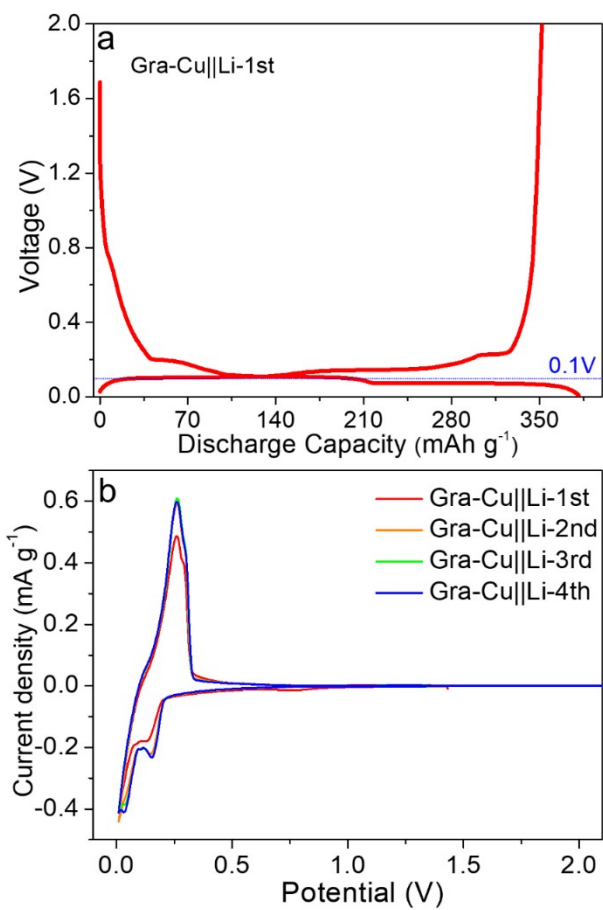

**Fig. S21** The discharging/charging curves of Graphite-Cu||Li at first cycles (a), and CV curves (b) of Graphite-Cu||Li cell at different cycles

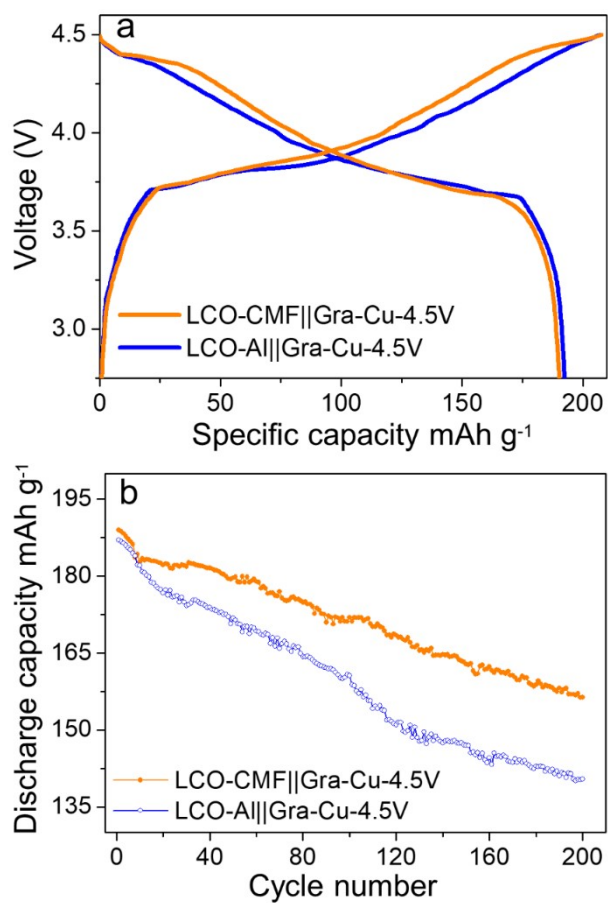

**Fig. S22** The discharging/charging curves (a) and cycle performances (b) of LCO-Al||Gra-Cu and LCO-CMF||Gra-Cu pouch cells with cutoff voltage of 4.5 V



**Table S1** The  $R_s$  and  $R_f$  of LCO-Al||Li and LCO-CMF||Li at different cycles from EIS results

|                    | LCO-Al  Li-5th | LCO-CMF  Li-5th | LCO-Al  Li-200th | LCO-CMF  Li-200th |
|--------------------|----------------|-----------------|------------------|-------------------|
| $R_s$ ( $\Omega$ ) | 3              | 3.3             | 4.2              | 4.8               |
| $R_f$ ( $\Omega$ ) | 164            | 115             | 212              | 172               |

**Table S2** The contents of LCO on Al foil and CMF before and after cycles

| Element                  | C (At%) | Co (At%) | O (At%) | F (At%) | Total (%) |
|--------------------------|---------|----------|---------|---------|-----------|
| LCO-Al after 200 cycles  | 12.21   | 75.39    | 8.17    | 4.23    | 100       |
| LCO-CMF after 200 cycles | 15.28   | 71.62    | 10.39   | 2.71    | 100       |
| LCO-Al before cycle      | 10.61   | 78.92    | 10.47   | ---     | 100       |

**Table S3** The sheet resistance of different CMF using for loading LCO before and after cycles

| Resistance           | R1 $\Omega\text{cm}^{-1}$ | R2 $\Omega\text{cm}^{-1}$ | R3 $\Omega\text{cm}^{-1}$ | R <sub>average</sub> |
|----------------------|---------------------------|---------------------------|---------------------------|----------------------|
| CMF before cycle     | 5.4                       | 5.6                       | 5.4                       | 5.5                  |
| CMF after 200 cycles | 6.2                       | 6.4                       | 6.8                       | 6.5                  |

**Table S4** Comparison of electrochemical performances based on CMF with other previous LCO-based batteries

| Strategy                                                                                      | Configuration            | Capacity retention (%)   | Areal loading (mg cm <sup>-2</sup> ) | Voltage (V)          | Energy density Wh Kg <sup>-1</sup> | Ref.      |
|-----------------------------------------------------------------------------------------------|--------------------------|--------------------------|--------------------------------------|----------------------|------------------------------------|-----------|
| Li <sub>1.5</sub> Al <sub>0.5</sub> Ti <sub>1.5</sub> (PO <sub>4</sub> ) <sub>3</sub> coating | LCO  Li                  | 88 (100th)               | 3                                    | 3.0-4.6              | 306                                | 3         |
| nitriles and fluoroethylene carbonate +1 M LiPF <sub>6</sub> EC/ EMC                          | LCO  Li                  | 75 (300th)               | 6                                    | 3.0-4.6              | 431                                | 4         |
| Mg doping                                                                                     | LCO  Li                  | 84 (100th)               | 3                                    | 3.0-4.6              | 304                                | 5         |
| LHCE+1 M LiPF <sub>6</sub> EC/ EMC                                                            | LCO  Li                  | 84 (300th)               | 13.5                                 | 3.0-4.5              | 530                                | 6         |
| PVDF–PVAC                                                                                     | LCO  Li                  | 85 (200th)               | 1.5                                  | 3.0-4.5              | 180                                | 7         |
| PDES-CPE                                                                                      | LCO  Li                  | 82 (100th)               | 1                                    | 3.0-4.6              | 152                                | 8         |
| Mg、 La doping Ti coating                                                                      | LCO  Li                  | 83 (300th)               | 12                                   | 3.0-4.5              | 514                                | 9         |
| Lithium-Aluminum-Phosphate coating                                                            | LCO  Li                  | 89 (200th)               | 3-4                                  | 3.0-4.6              | 375                                | 10        |
| La、 Al doping                                                                                 | LCO  Li<br>LCO  Gra      | 96 (50th)<br>74 (60th)   | 10<br>10                             | 3.0-4.5<br>2.5-4.5   | 488<br>500                         | 11        |
| Al、 Ti doping Mg coating                                                                      | LCO  Li<br>LCO  MC<br>MB | 75 (200th)<br>78 (200th) | 1.5<br>7                             | 3.0-4.6<br>3.0-4.5   | 211<br>480                         | 12        |
| Li、 Al doping F coating                                                                       | LCO  Li<br>LCO  Gra      | 82 (200th)<br>76 (70th)  | 12.6<br>12.6                         | 3.0-4.6<br>3.0-4.6   | 572<br>568                         | 13        |
| Mg、 Al、 Ti doping                                                                             | LCO  Li<br>LCO  Gra      | 86 (100th)<br>79 (70th)  | 3-4<br>15                            | 3.0-4.6<br>3.0-4.55  | 340<br>652                         | 14        |
| Se coating                                                                                    | LCO  Li<br>LCO  Gra      | 85 (120th)<br>80 (250th) | 3<br>17                              | 3.0-4.62<br>3.0-4.57 | 364<br>634                         | 15        |
| LiNi <sub>0.5</sub> Mn <sub>1.5</sub> O <sub>4</sub> coating                                  | LCO  Li<br>LCO  Gra      | 72 (50th)<br>81 (400th)  | 5<br>10                              | 3.0-4.6<br>3.0-4.45  | 431<br>421                         | 16        |
| Li <sub>1.5</sub> Al <sub>0.5</sub> Ge <sub>1.5</sub> (PO <sub>4</sub> ) <sub>3</sub> coating | LCO  Gra                 | 83 (200th)               | 9                                    | 2.5-4.45             | 446                                | 17        |
| LiNi <sub>0.45</sub> Al <sub>0.05</sub> Mn <sub>0.5</sub> O <sub>2</sub> coating              | LCO  Gra                 | 87 (150th)               | 10                                   | 3.0-4.48             | 458                                | 18        |
| Li <sub>4</sub> Ti <sub>5</sub> O <sub>12</sub> coating                                       | LCO  Gra                 | 89 (150th)               | 12                                   | 2.8-4.5              | 449                                | 19        |
| cathode prelithiation                                                                         | LCO  Gra-SiO             | 76 (100th)               | 18.5                                 | 3.0-4.2              | 442                                | 20        |
| DMSE+1 M LiPF <sub>6</sub> EC/DMC/EMC                                                         | LCO  Gra                 | 66 (100th)               | 15.4                                 | 3.0-4.5              | 588                                | 21        |
| CMF as current collector                                                                      | LCO  Li<br>LCO  Gra      | 94(300th)<br>82(200th)   | 5<br>16                              | 3.0-4.5<br>3.0-4.4   | 651<br>645                         | This Work |

Note: The energy density is calculated based on the weight of cathode electrode.

## References

- 1 W. Weppner and R. A. Huggins, Determination of the kinetic parameters of mixed-conducting electrodes and application to the system  $\text{Li}_3\text{Sb}$ , *J. Electrochem. Soc.*, 1977, **124**, 1569-1578.
- 2 Q. F. Fu, R. J. Li, X. Z. Zhu, G. S. Liang, L. J. Luo, Y. J. Chen, C. F. Lin and X. S. Zhao, Design, synthesis and lithium-ion storage capability of  $\text{Al}_{0.5}\text{Nb}_{24.5}\text{O}_{62}$ , *J. Mater. Chem. A*, 2019, **7**, 19862-19872.
- 3 Y. Wang, Q. H. Zhang, Z. C. Xue, L. F. Yang, J. Y. Wang, F. Q. Meng, Q. H. Li, H. Y. Pan, J. N. Zhang, Z. Jiang, W. L. Yang, X. Q. Yu, L. Gu and H. Li, An in situ formed surface coating layer enabling  $\text{LiCoO}_2$  with stable 4.6 V high-voltage cycle performances, *Adv. Energy Mater.*, 2020, **15**, 2001413-1-10.
- 4 X. R. Yang, M. Lin, G. R. Zheng, J. Wu, X. S. Wang, F. C. Ren, W. G. Zhang, Y. Liao, W. M. Zhao, Z. G. Zhang, N. B. Xu, W. L. Yang and Y. Yang, Enabling stable high-voltage  $\text{LiCoO}_2$  operation by using synergetic interfacial modification strategy, *Adv. Funct. Mater.*, 2020, **30**, 2004664-1-12.
- 5 Y. Y. Huang, Y. C. Zhu, H. Y. Fu, M. Y. Ou, C. C. Hu, S. J. Yu, Z. W. Hu, C. T. Chen, G. Jiang, H. K. Gu, H. Lin, W. Luo and Y. H. Huang, Mg-pillared  $\text{LiCoO}_2$ : towards stable cycling at 4.6 V, *Angew. Chem.*, 2021, **13**, 4732-4738.
- 6 X. D. Ren, X. H. Zhang, Z. Shadik, L. F. Zou, H. Jia, X. Cao, M. H. Engelhard, B. E. Matthews, C. M. Wang, B. W. Arey, X. Q. Yang, J. Liu, J. G. Zhang and W. Xu, Designing advanced in situ electrode/electrolyte interphases for wide temperature operation of 4.5 V  $\text{Li}||\text{LiCoO}_2$  batteries, *Adv. Mater.*, 2020, **32**, 2004898-1-8.
- 7 X. R. Yu, L. L. Wang, J. Ma, X. W. Sun, X. H. Zhou and G. L. Cui, Selectively wetted rigid-flexible coupling polymer electrolyte enabling superior stability and compatibility of high-voltage lithium metal batteries, *Adv. Energy Mater.*, 2020, **10**, 1903939-1-9.
- 8 C. Wang, H. R. Zhang, S. M. Dong, Z. L. Hu, R. X. Hu, Z. Y. Guo, T. Wang, G. L. Cui and L. Q. Chen, High polymerization conversion and stable high-voltage chemistry underpinning an in situ formed solid electrolyte, *Chem. Mater.*, 2020, **32**, 9167-9175.
- 9 T. Tian, T. W. Zhang, Y. C. Yin, Y. H. Tan, Y. H. Song, L. L. Lu and H. B. Yao, Blow-spinning enabled

precise doping and coating for improving high voltage lithium cobalt oxide cathode performance, *Nano Lett.*, 2019, **20**, 677-685.

10 X. Wang, Q. Wu, S. Y. Li, Z. M. Tong, D. Wang, H. L. Zhuang, X. Y. Wang and Y. Y. Lu, Lithium-Aluminum-phosphate coating enables stable 4.6 V cycling performance of LiCoO<sub>2</sub> at room temperature and beyond, *Energy Stor. Mater.*, 2021, **37**, 67-76.

11 Q. Liu, X. Su, D. Lei, Y. Qin, J. G. Wen, F. M. Guo, Y. M. Wu, Y. C. Rong, R. H. Kou, X. H. Xiao, F. Aguesse, J. Bareño, Y. Ren, W. Q. Lu and Y. X. Li, Approaching the capacity limit of lithium cobalt oxide in lithium ion batteries via lanthanum and aluminium doping, *Nat. Energy*, 2018, **3**, 936-943.

12 L. L. Wang, J. Ma, C. Wang, X. R. Yu, R. Liu, F. Jiang, X. W. Sun, A. Du, X. H. Zhou and G. L. Cui, A novel bifunctional self-stabilized strategy enabling 4.6 V LiCoO<sub>2</sub> with excellent long-term cyclability and high-rate capability, *Adv. Sci.*, 2019, **19**, 1900355-1-11.

13 J. W. Qian, L. Liu, J. X. Yang, S. Y. Li, X. Wang, H. L. Luo and Y. Y. Lu, Electrochemical surface passivation of LiCoO<sub>2</sub> particles at ultrahigh voltage and its applications in lithium-based batteries, *Nat. Commun.*, 2018, **9**, 4918-1-11.

14 J. N. Zhang, Q. H. Li, C. Y. Ouyang, X. Q. Yu, M. Y. Ge, X. J. Huang, E. Y. Hu, C. Ma, S. F. Li, R. J. Xiao, W. L. Yang, Y. Chu, Y. J. Liu, H. G. Yu, X. Q. Yang, X. J. Huang, L. Q. Chen and H. Li, Trace doping of multiple elements enables stable battery cycling of LiCoO<sub>2</sub> at 4.6 V, *Nat. Energy*, 2019, **4**, 594-603.

15 Z. Zhu, H. Wang, Y. Li, R. Gao, X. H. Xiao, Q. P. Yu, C. Wang, I. Waluyo, J. X. Ding, A. Hunt and J. Li, A surface Se-substituted LiCo[O<sub>2-δ</sub>Se<sub>δ</sub>] cathode with ultrastable high-voltage cycling in pouch full-cells, *Adv. Mater.*, 2020, **32**, 2005182-1-8.

16 P. P. Pang, Z. Wang, Y. M. Deng, J. M. Nan, Z. Y. Xing and H. Li, Delayed phase transition and improved cycling/thermal stability by spinel LiNi<sub>0.5</sub>Mn<sub>1.5</sub>O<sub>4</sub> modification for LiCoO<sub>2</sub> cathode at high voltages, *ACS Appl. Mater. Inter.*, 2020, **12**, 27339-27349.

- 17 Z. Y. Lia, A. J. Li, H. R. Zhang, F. H. Ning, W. X. Li, A. Zangiabadi, Q. Cheng, J. J. Borovilas, Y. J. Chen, H. J. Zhang, X. H. Xiao, C. Y. Ouyang, X. J. Huang, W. Lee, M. Y. Ge, Y. S. Chu, X. Y. Chuan and Y. Yang, Multi-scale stabilization of high-voltage  $\text{LiCoO}_2$  enabled by nanoscale solid electrolyte coating, *Energy Stor. Mater.*, 2020, **29**, 71-77.
- 18 P. P. Pang, Z. Wang, X. X. Tan, Y. M. Deng, J. M. Nan, Z. Y. Xing and H. Li,  $\text{LiCoO}_2$  @ $\text{LiNi}_{0.45}\text{Al}_{0.05}\text{Mn}_{0.5}\text{O}_2$  as high-voltage lithium-ion battery cathode materials with improved cycling performance and thermal stability, *Electrochim. Acta*, 2019, **327**, 135018-1-9.
- 19 C. W. Wang, Y. Zhou, J. H. You, J. D. Chen, Z. Zhang, S. J. Zhang, C. G. Shi, W. D. Zhang, M. H. Zou, Y. Yu, J. T. Li, L. Y. Zeng, L. Huang and S. G. Sun, High-voltage  $\text{LiCoO}_2$  material encapsulated in a  $\text{Li}_4\text{Ti}_5\text{O}_{12}$  ultra-thin layer by high-speed solid-phase coating process, *ACS Appl. Energy Mater.*, 2020, **3**, 2593-2603.
- 20 X. X. Liu, Y. C. Tan, W. Y. Wang, C. H. Li, Z. W. Seh, L. Wang and Y. M. Sun, Conformal prelithiation nanoshell on  $\text{LiCoO}_2$  enabling high energy lithium-ion batteries, *Nano Lett.*, 2020, **20**, 4558-4565.
- 21 X. Z. Zheng, T. Huang, G. H. Fang, Y. Pan, Q. H. Li and M. X. Wu. Di(methylsulfonyl) ethane: new electrolyte additive for enhancing  $\text{LiCoO}_2$ /electrolyte interface stability under high voltage, *ACS Appl. Mater. Inter.*, 2019, **11**, 36244-36251.
